# Supplementary material
Source: PubMed Central journal article supplement (PMC3449036)

Type of file: figure

Label: Supp Figure S10

Filename: SrivastavaFigS10rev.jpg

Fig. S10. Srivastava et al

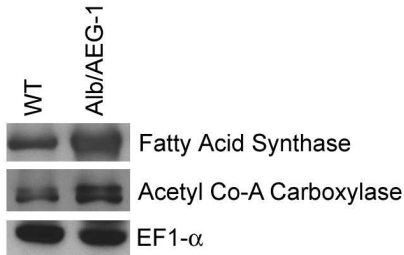

Type of file: figure

Label: Supp Figure S2

Filename: SrivastavaFigS2.jpg

Fig. S2. Srivastava et al.

WT

Alb/AEG-1

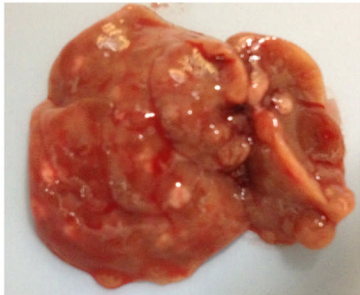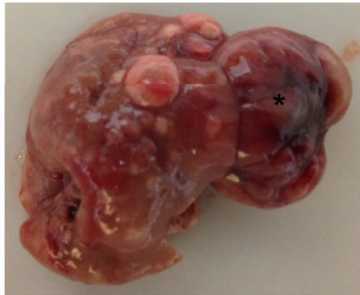

Type of file: figure

Label: Supp Figure S3

Filename: SrivastavaFigS3.jpg

Fig. S3. Srivastava et al.

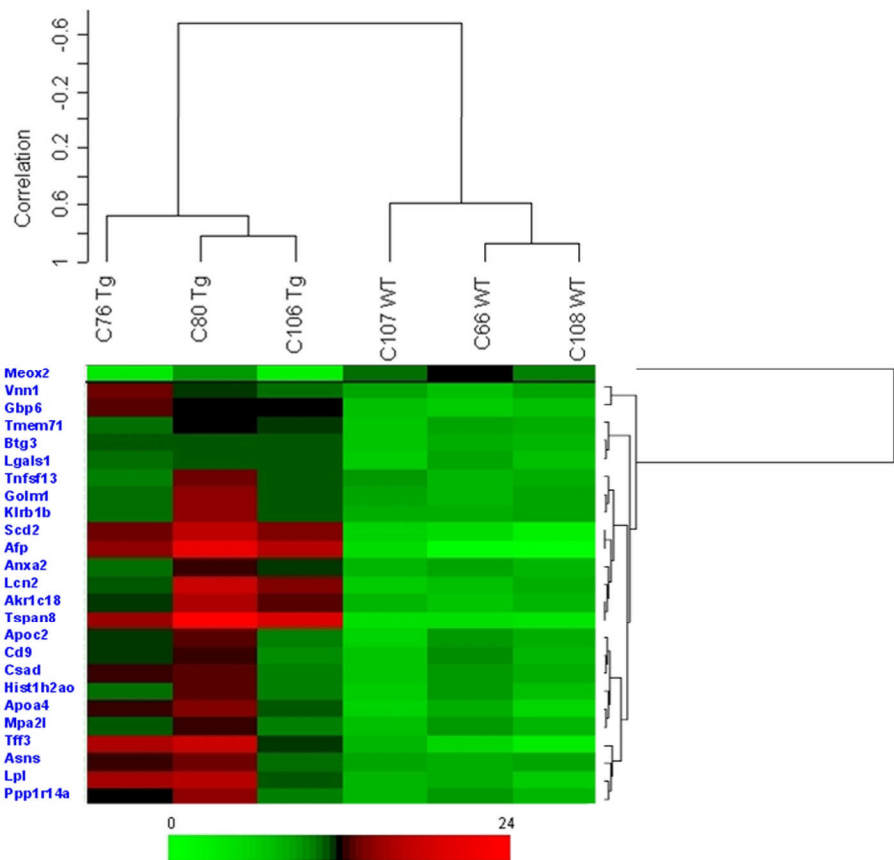

Type of file: figure

Label: Supp Figure S4

Filename: SrivastavaFigS4.jpg

Fig. S4. Srivastava et al.

A.

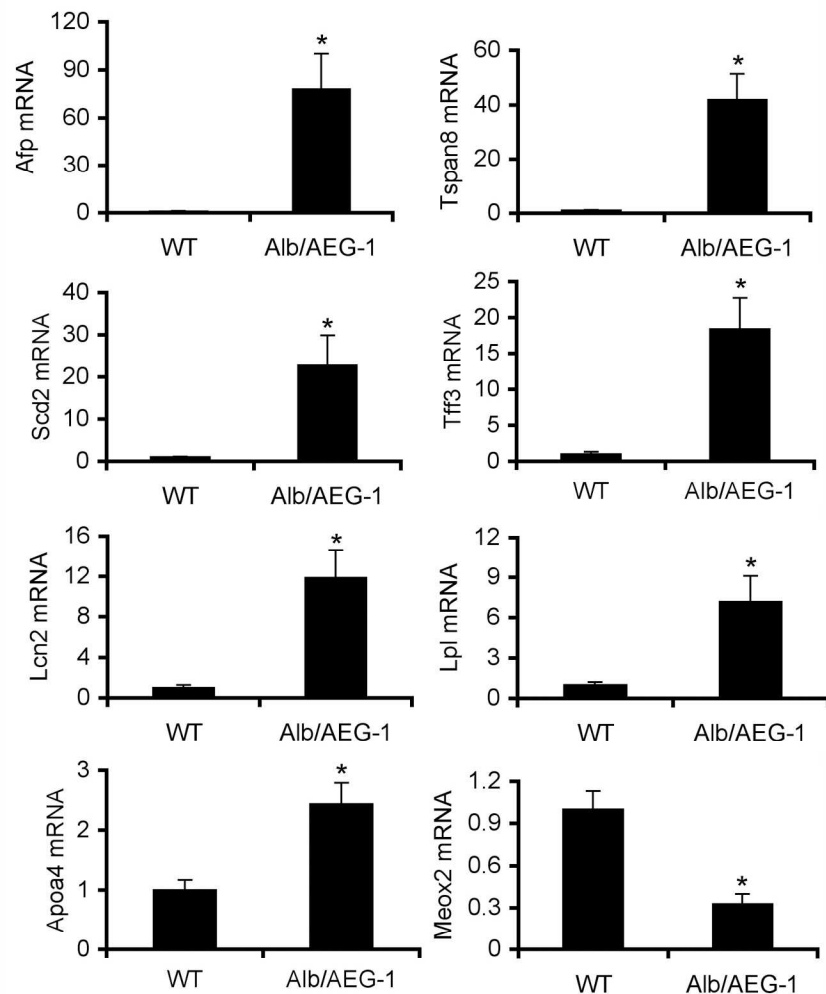

B.

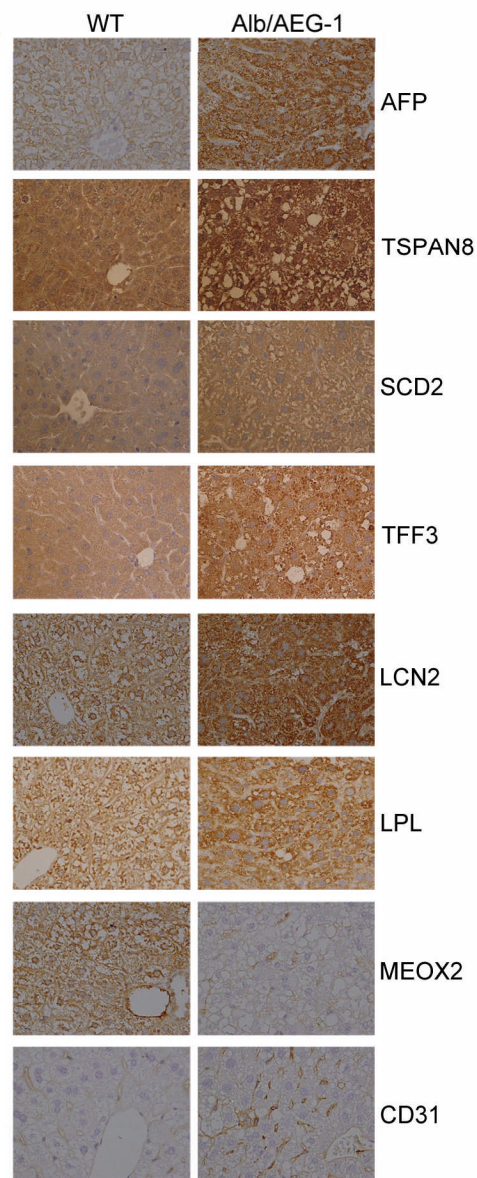



Type of file: figure

Label: Supp Figure S5

Filename: SrivastavaFigS5.jpg

Fig. S5. Srivastava et al.

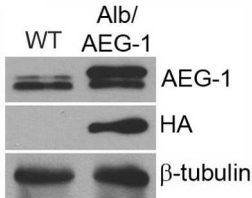

Type of file: figure

Label: Supp Figure S6

Filename: SrivastavaFigS6.jpg

Fig. S6. Srivastava et al.

A.

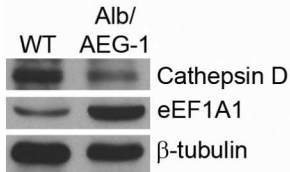

B.

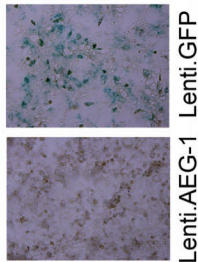

Type of file: figure

Label: Supp Figure S7

Filename: SrivastavaFigS7.jpg

Fig. S7. Srivastava et al.

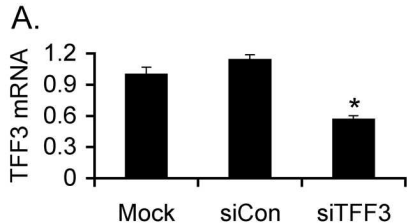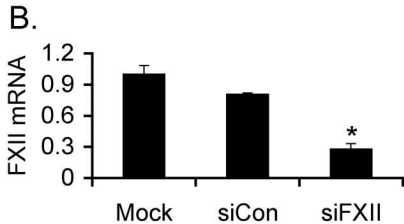

Type of file: figure

Label: Supp Figure S8

Filename: SrivastavaFigS8rev.jpg

Fig. S8. Srivastava et al.

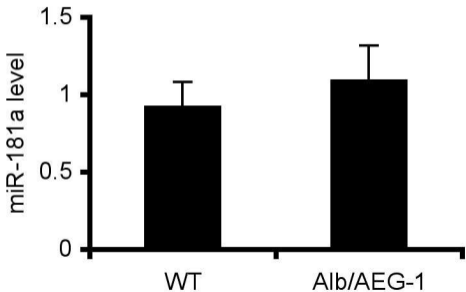



Type of file: figure

Label: Supp Figure S9

Filename: SrivastavaFigS9.jpg

Fig. S9. Srivastava et al.

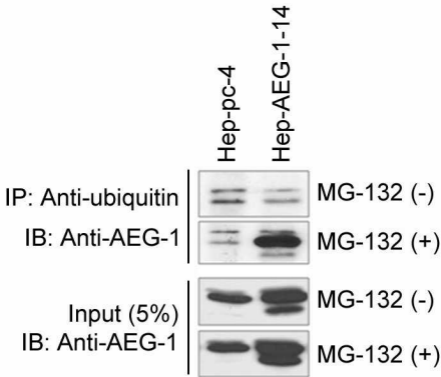

Supplement: NIHMS383401-supplement-01.pdf [file NIHMS383401-supplement-01.pdf]
